# Supplementary material for: Adsorptive Removal of Rhodamine B Dye Using Carbon Graphite/CNT Composites as Adsorbents: Kinetics, Isotherms and Thermodynamic Study
Source: MDPI journal article supplement (doi:10.3390/ma16031015), 2023-01-22
Supplement: s1 [file s1]

Supplementary Materials

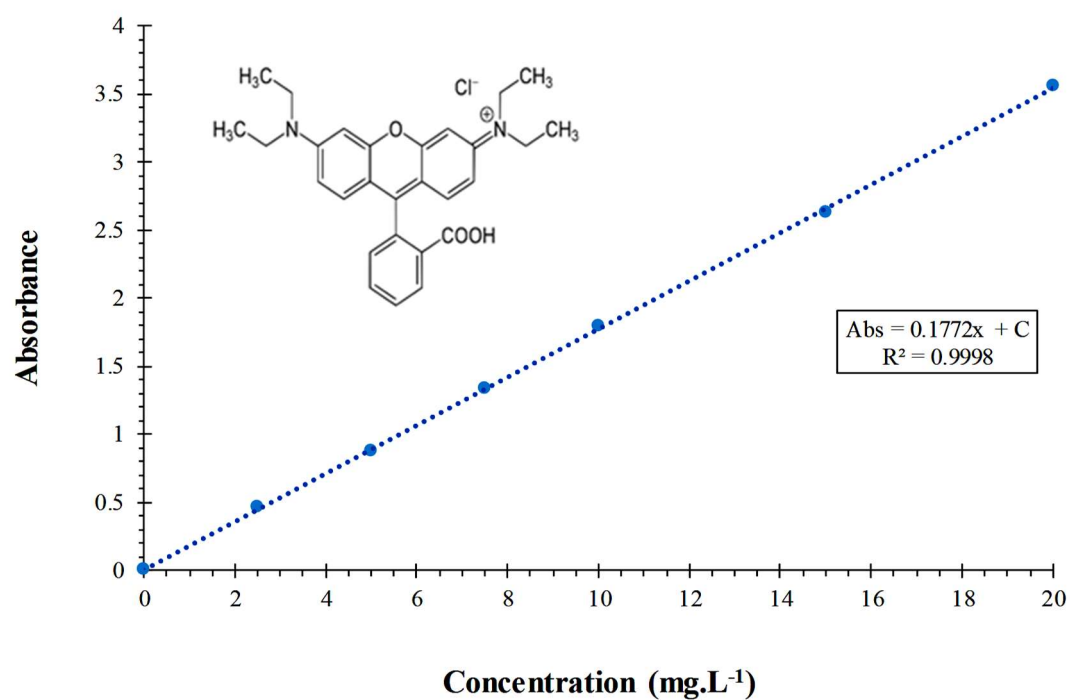

**Figure S1.** Calibration curve (at 555 nm) and chemical structure of Rhodamine B dye molecule (RhB).
